# Supplementary material for: Impact of Anti-Angiogenic Treatment on Bone Vascularization in a Murine Model of Breast Cancer Bone Metastasis Using Synchrotron Radiation Micro-CT
Source: MDPI journal article supplement (doi:10.3390/cancers14143443), 2022-07-15

Group (T1P): time point 1, placebo

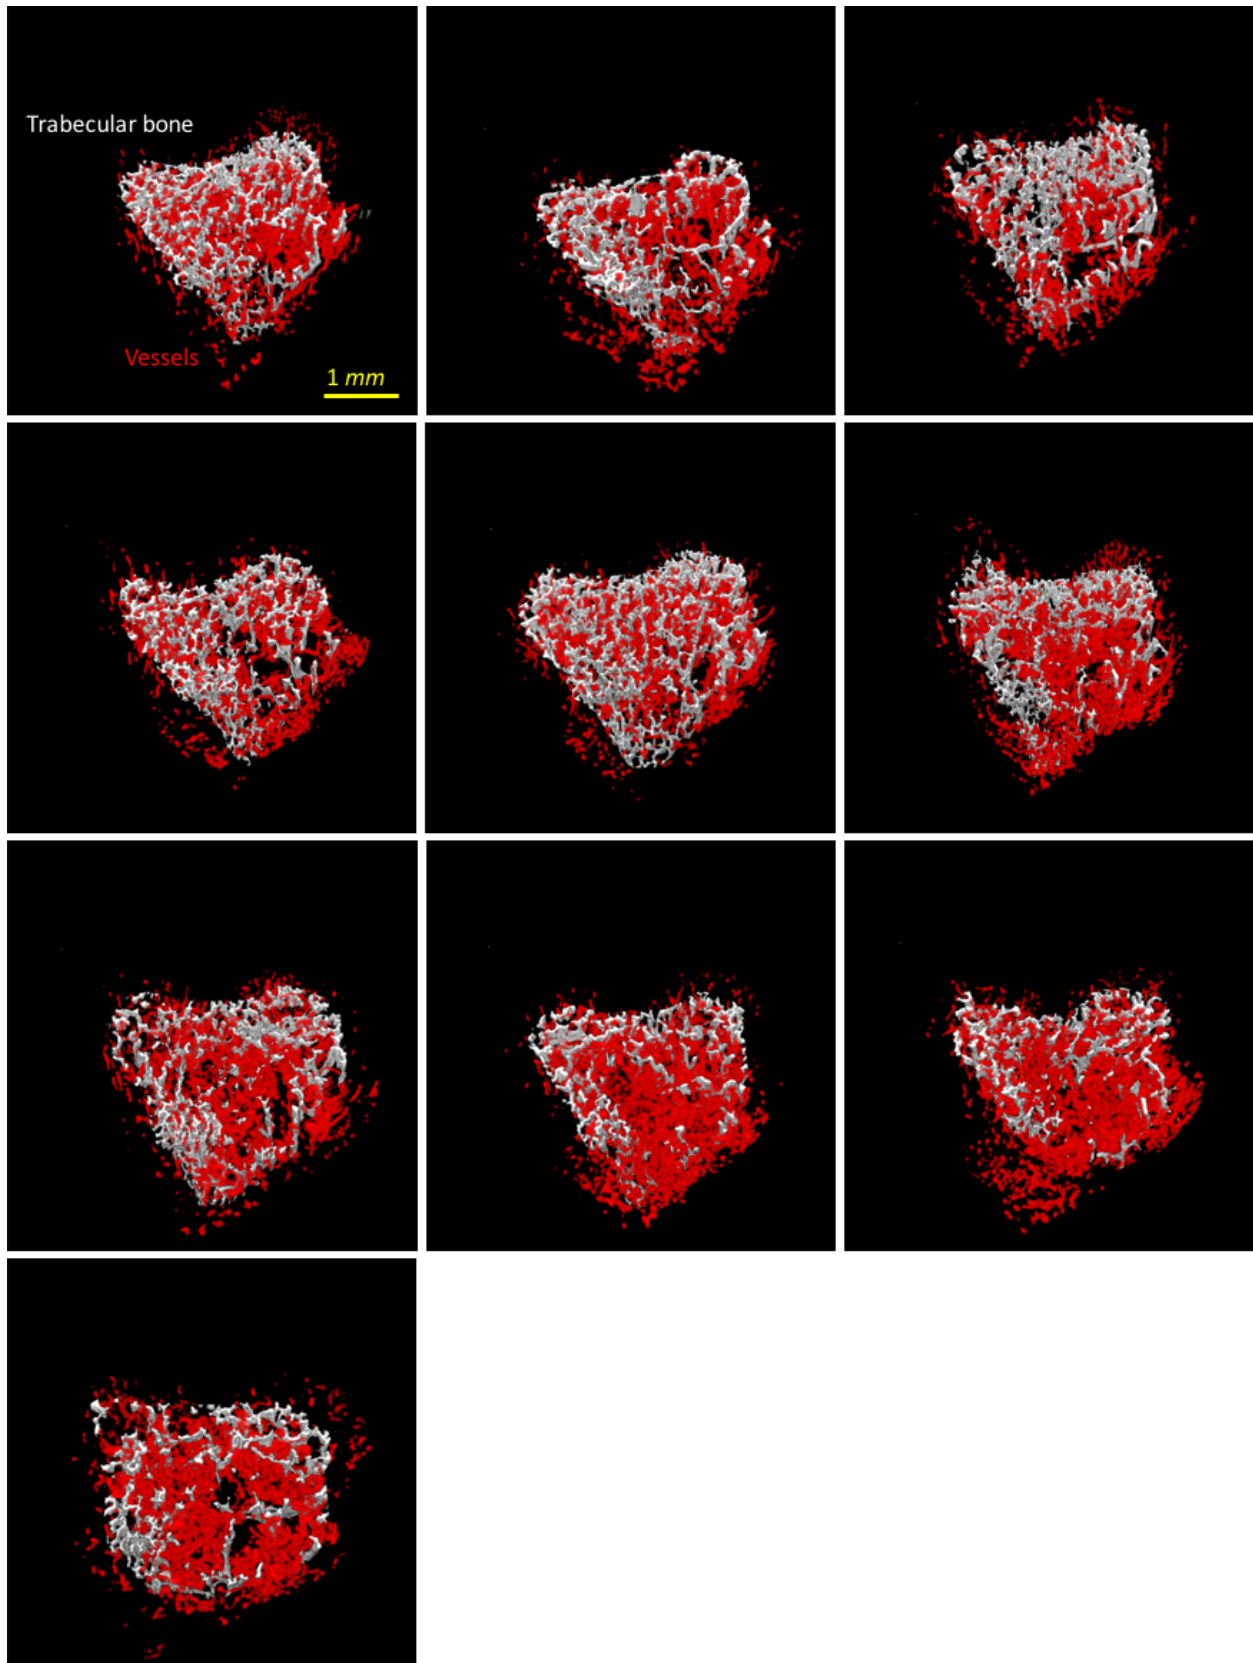

Group (T1B): time point 1, Bevacizumab

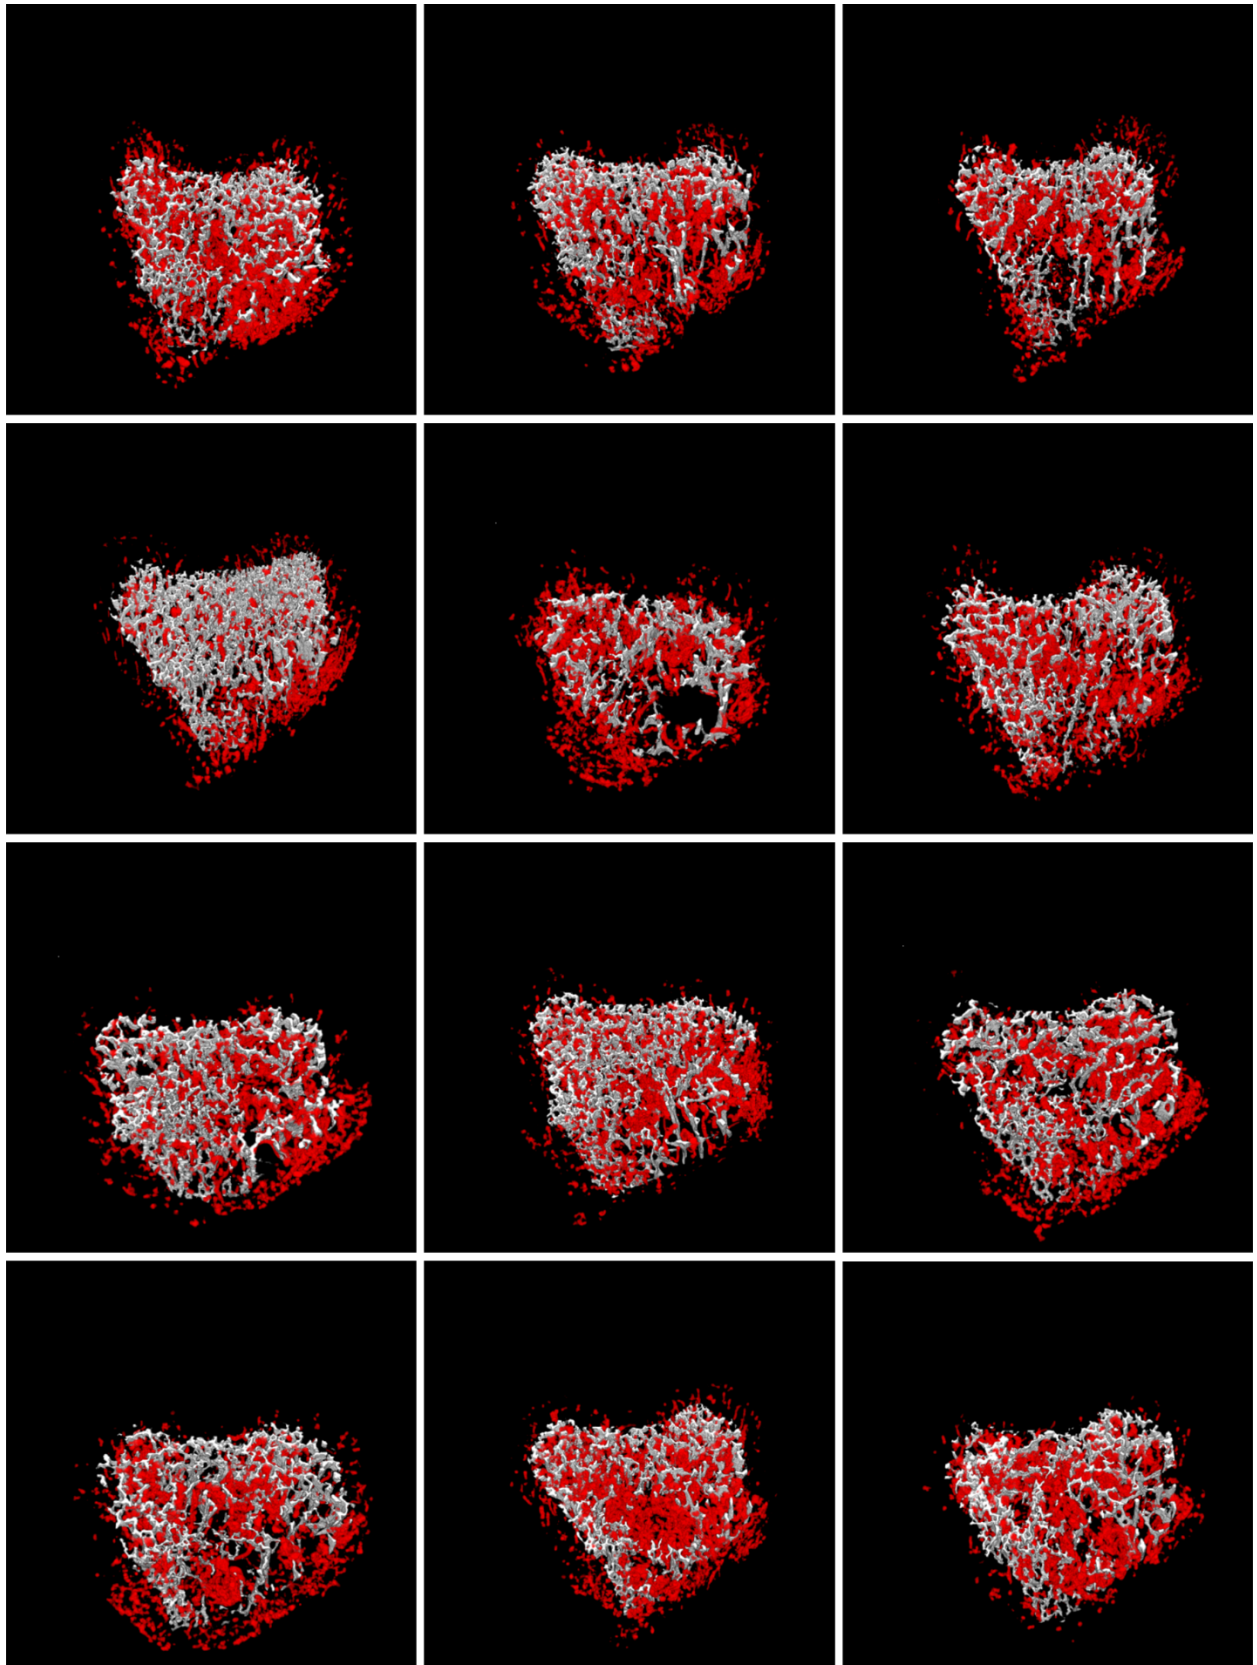

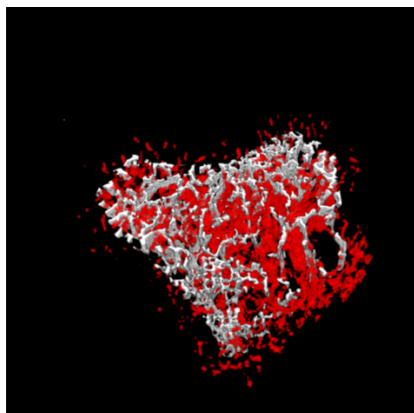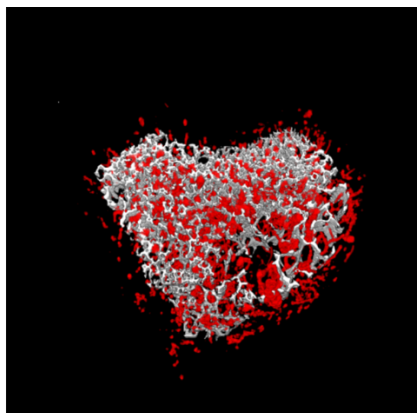

Group (T1V): time point 1, Vatalanib

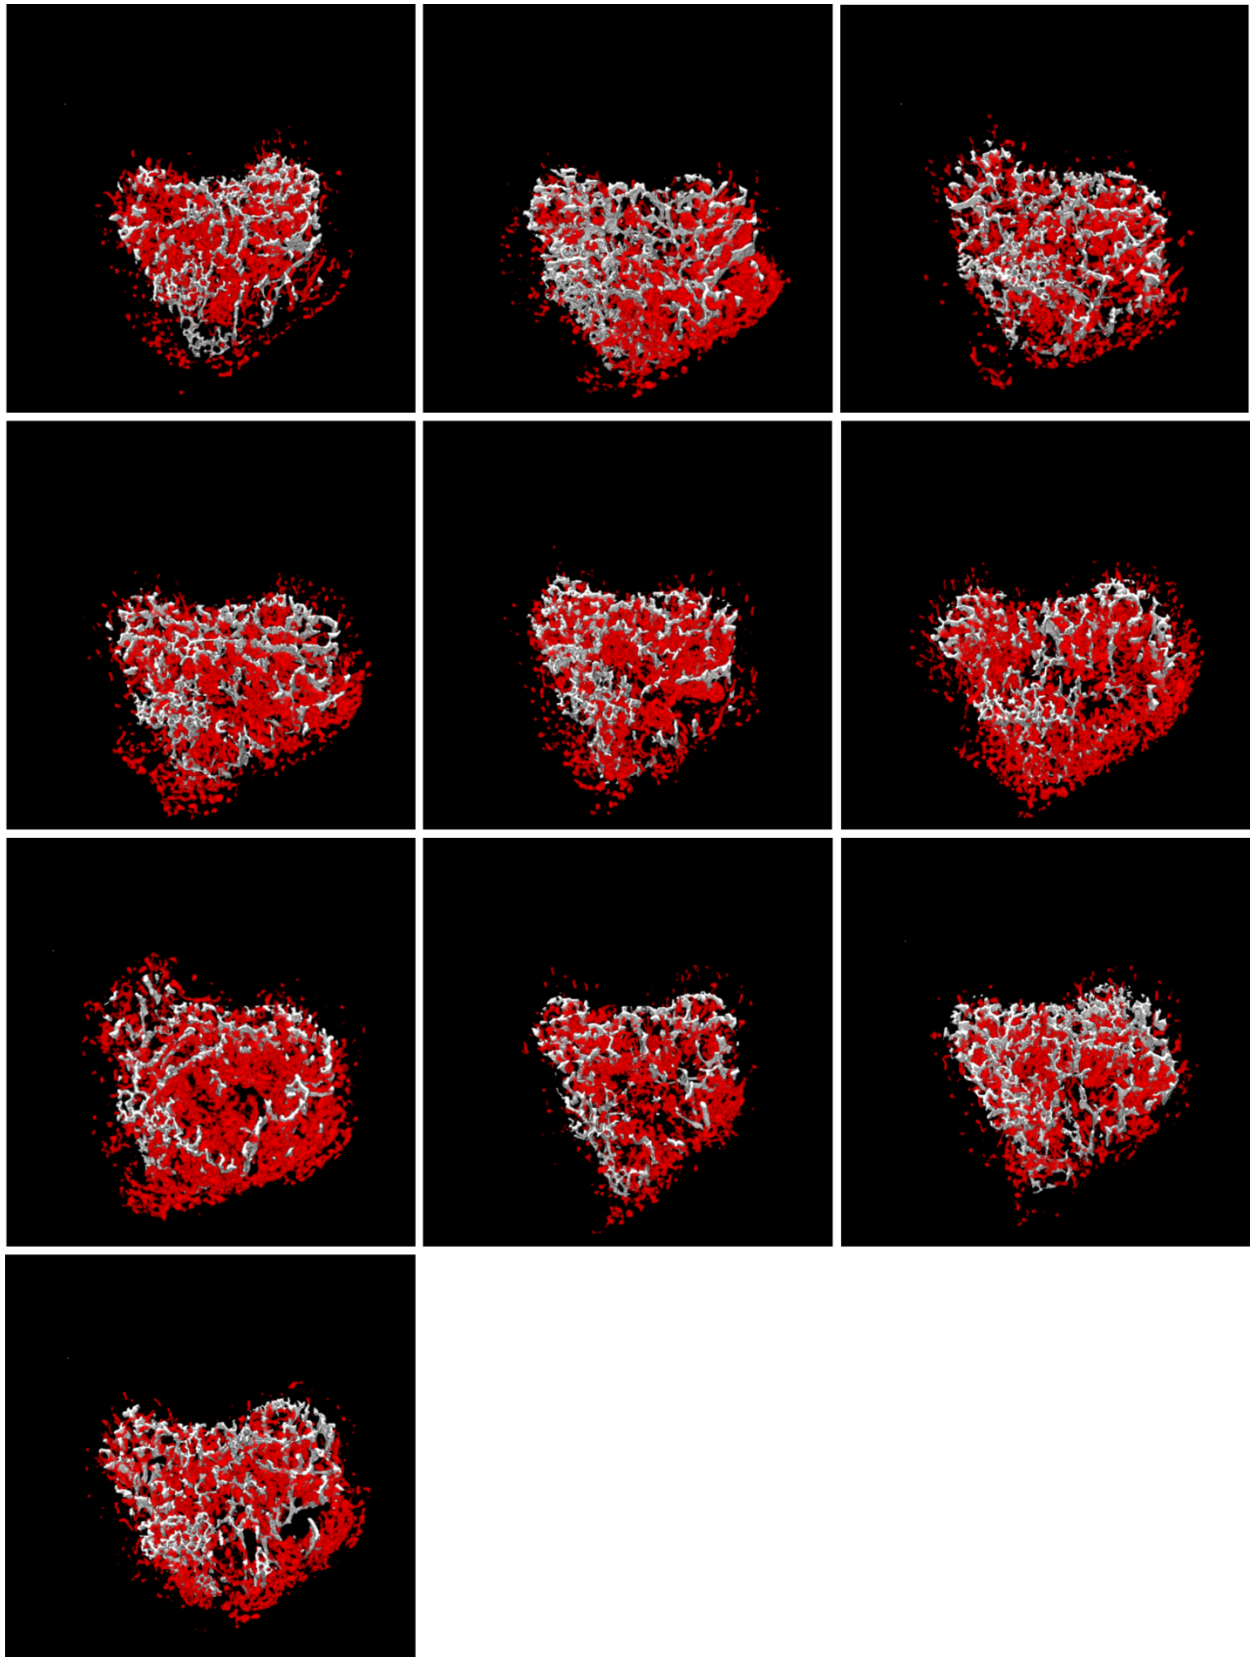

Group (T1C): time point 1, combination (Bevacizumab + Vatalanib)

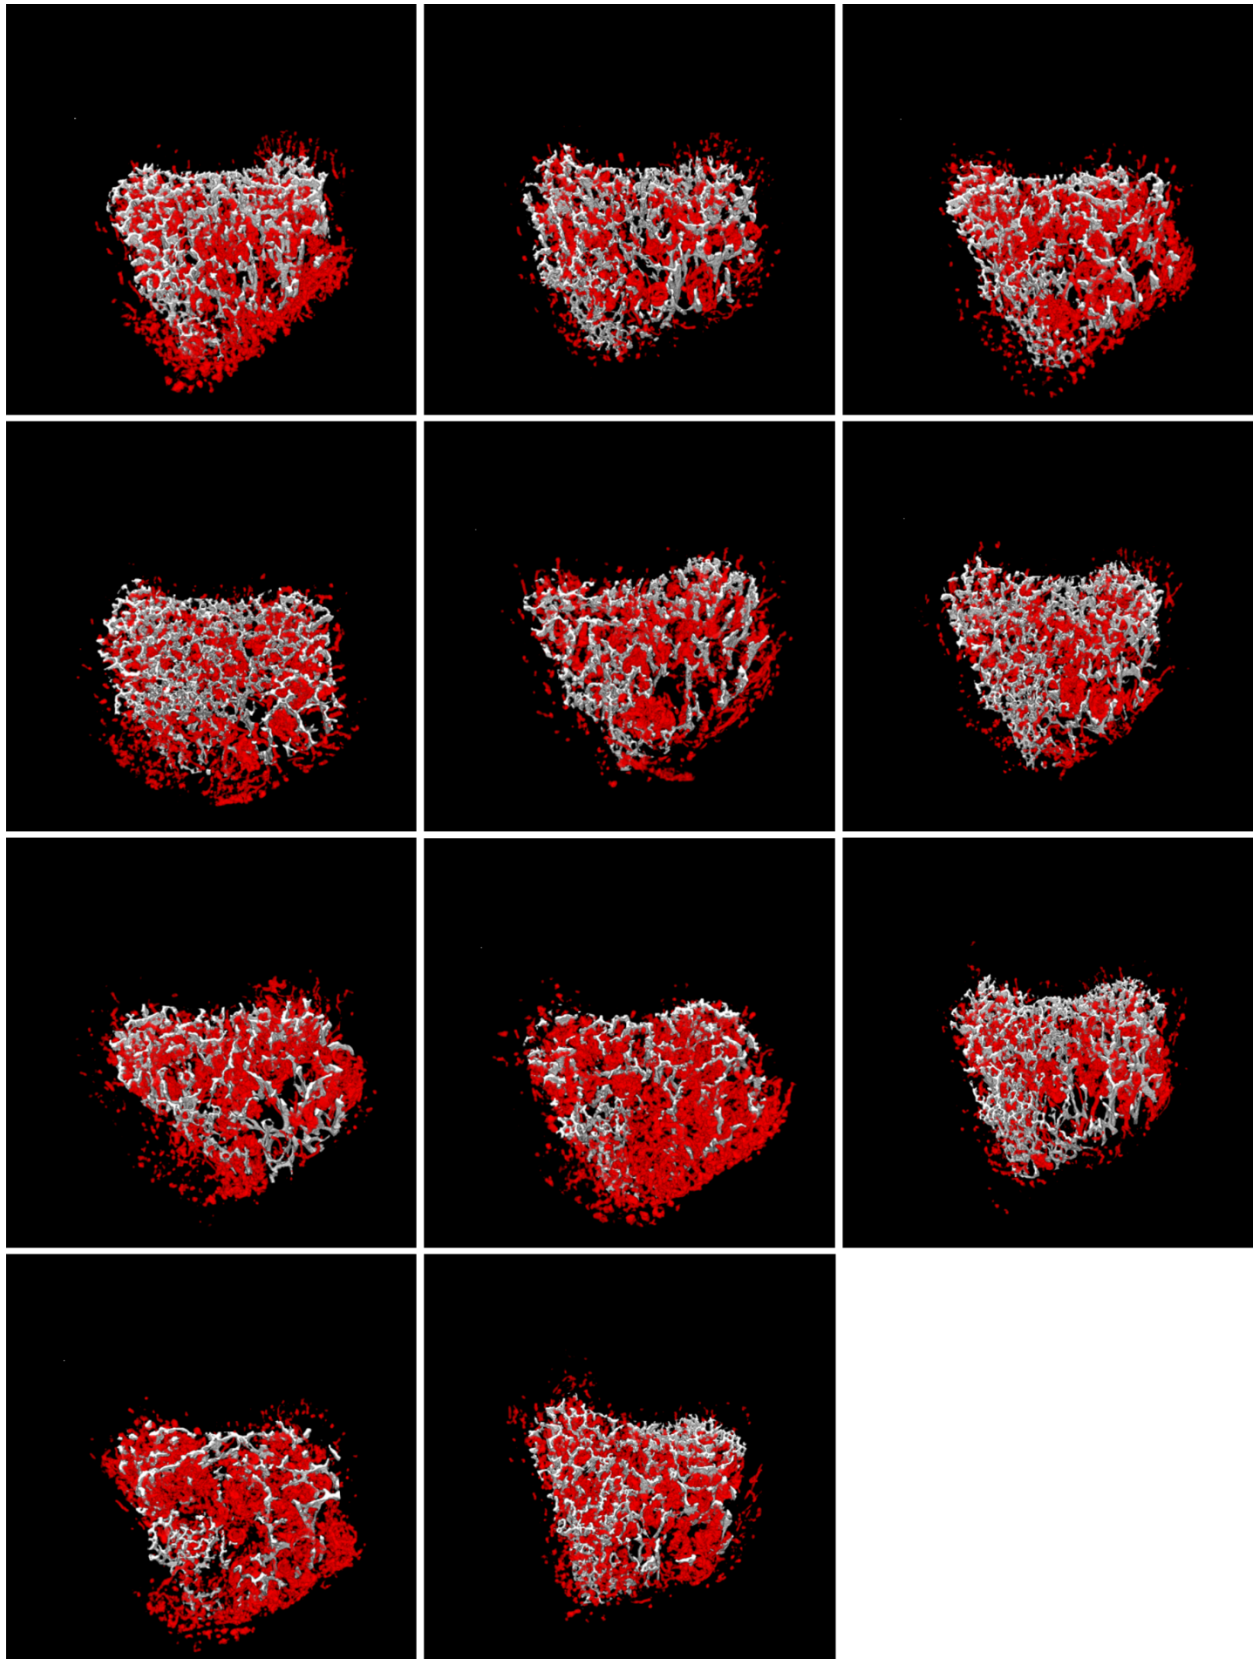



Group (T2P): time point 2, placebo

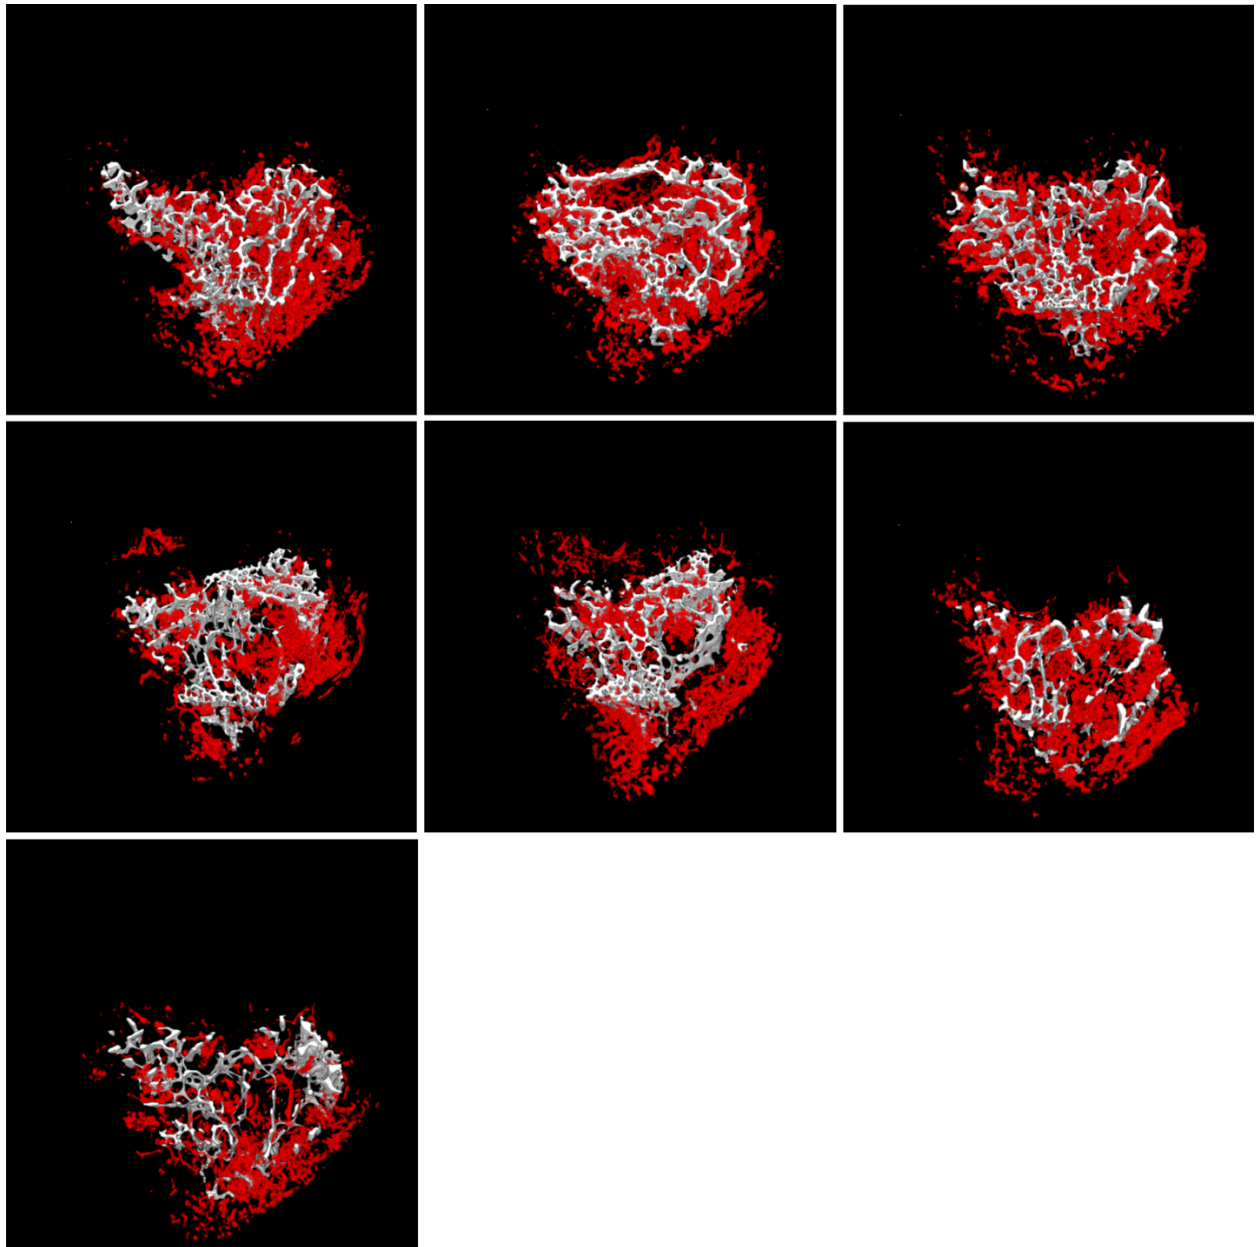

Group (T2B): time point 2, Bevacizumab

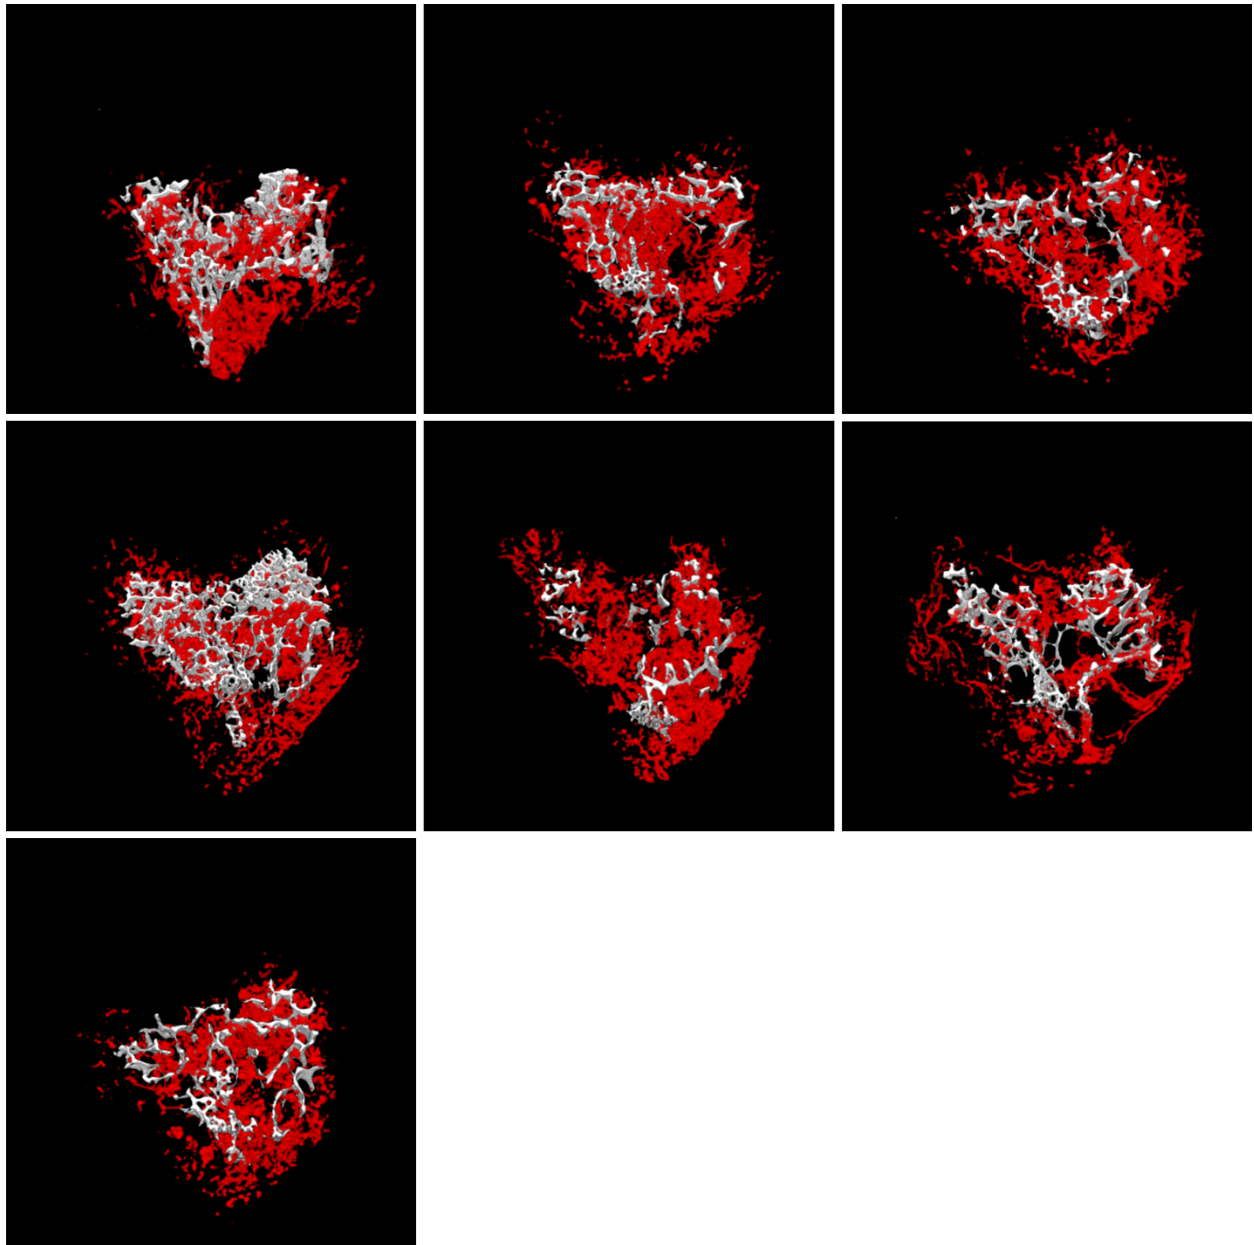

Group (T2V): time point 2, Vatalanib

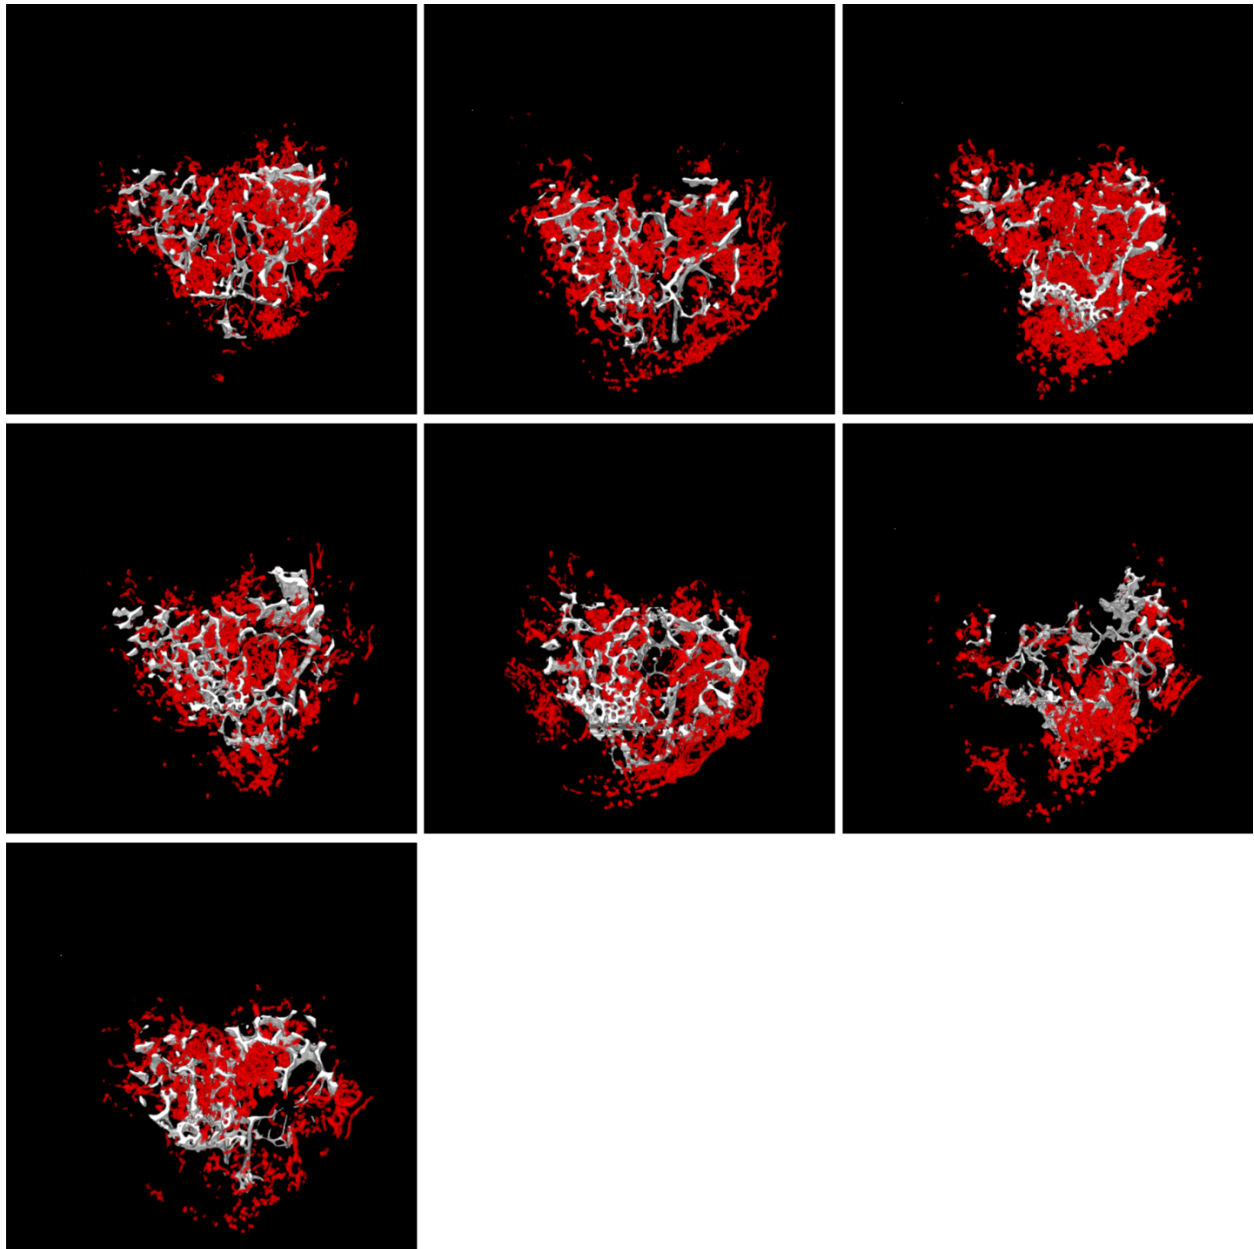



Group (T2C): time point 2, combination (Bevacizumab + Vatalanib)

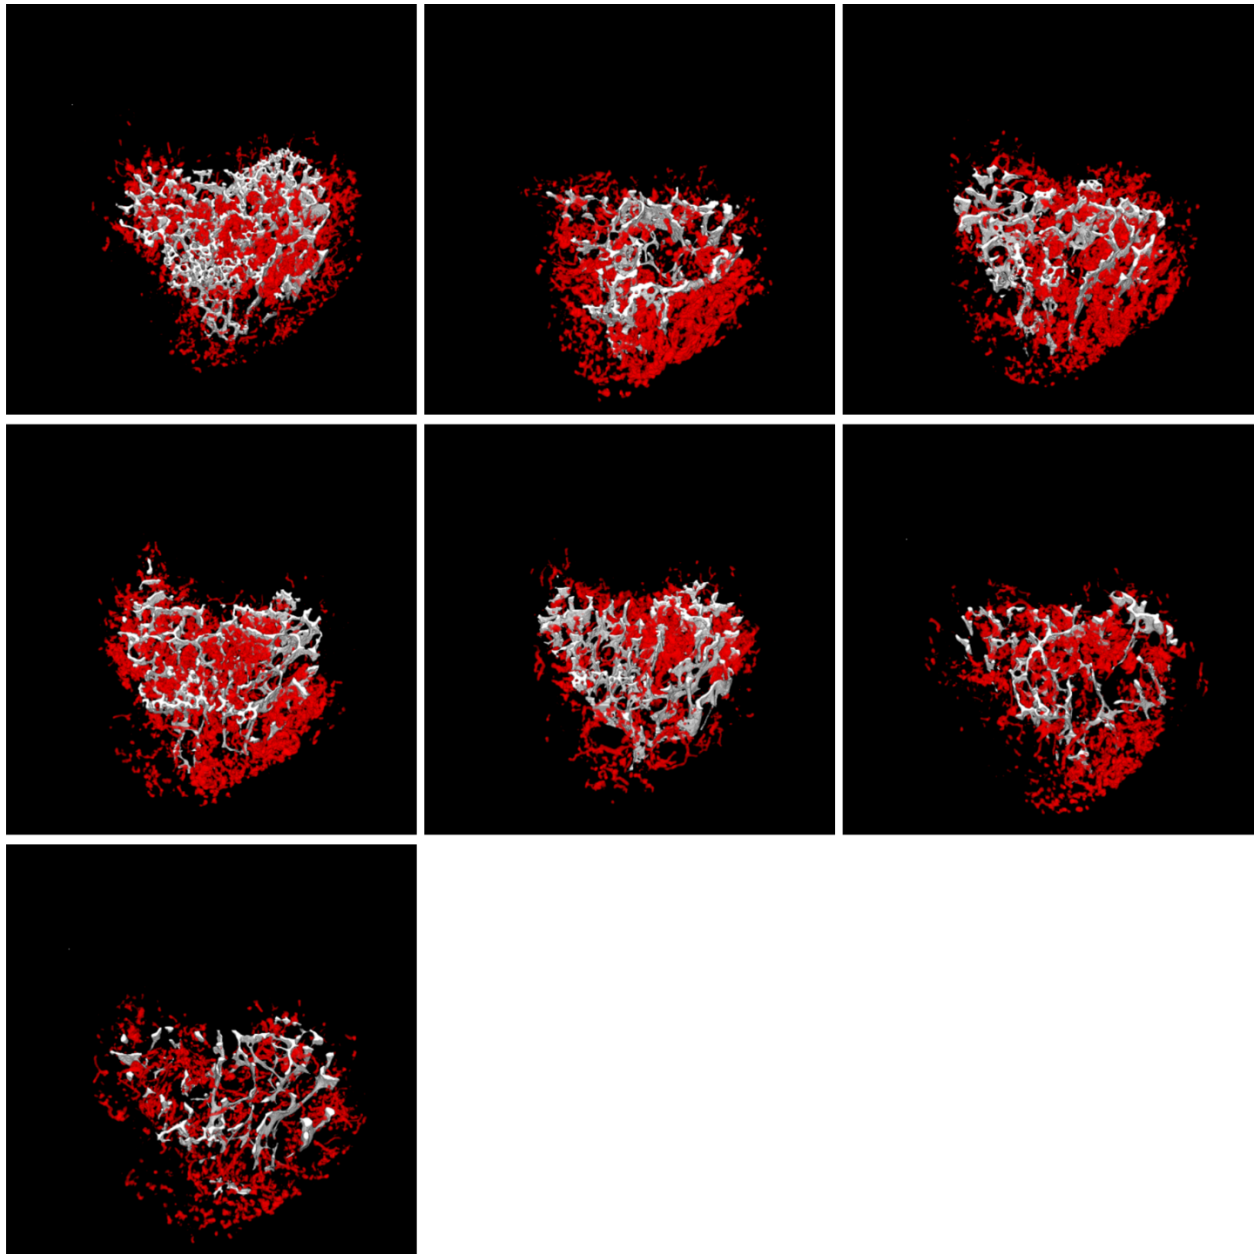

Supplement: s1 [file s1]
