# Supplementary material for: Impact of Anti-Angiogenic Treatment on Bone Vascularization in a Murine Model of Breast Cancer Bone Metastasis Using Synchrotron Radiation Micro-CT
Source: MDPI journal article supplement (doi:10.3390/cancers14143443), 2022-07-15
Supplement: s1 [file s1]

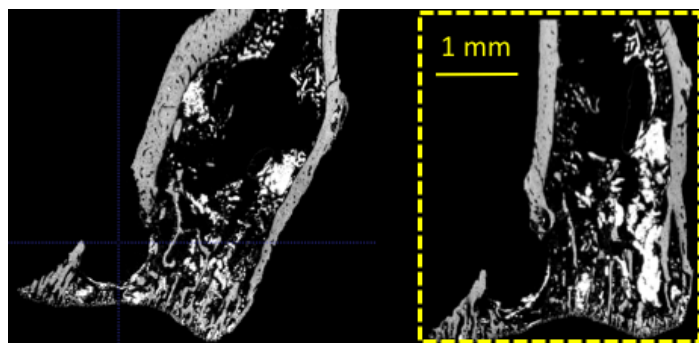

**Fig. S1** Illustration of image pre-processing. The left figure represents a sagittal slice in the original 3D image. The right one stands for the pre-processing result, after reorientation, cropping and bounding box

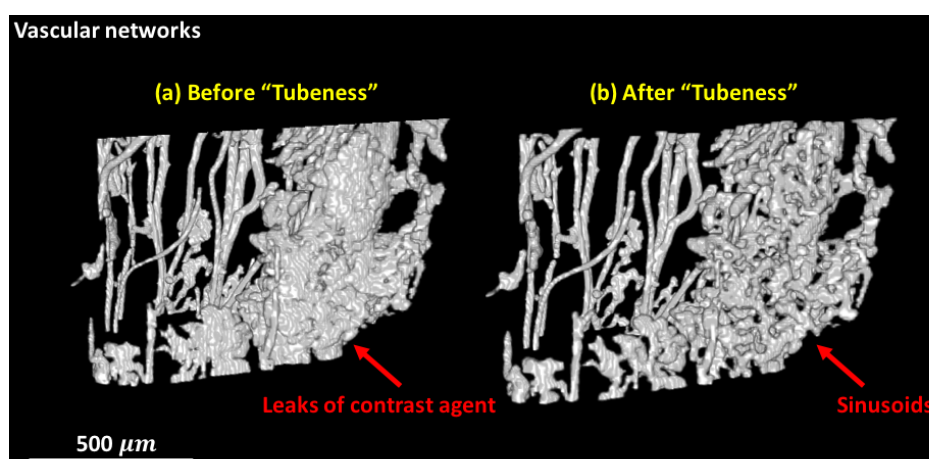

**Fig. S2** “Tubeness” enhancement of the 3D vascular network. (a) original image, in which sinusoids appear buried due to the leaks of contrast agent as indicated by red arrow; (b) vascular network with “Tubeness” enhancement, in which the leaks and the recovery of sinusoids are improved as indicated by red arrow

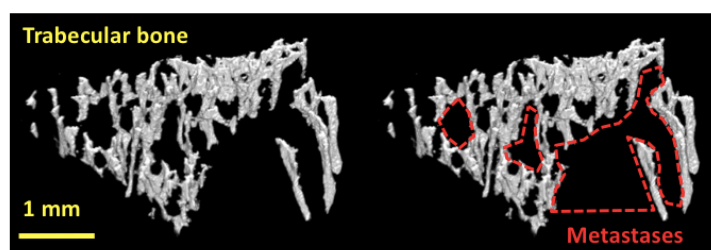

**Fig. S3** Illustration of metastases on trabecular bone

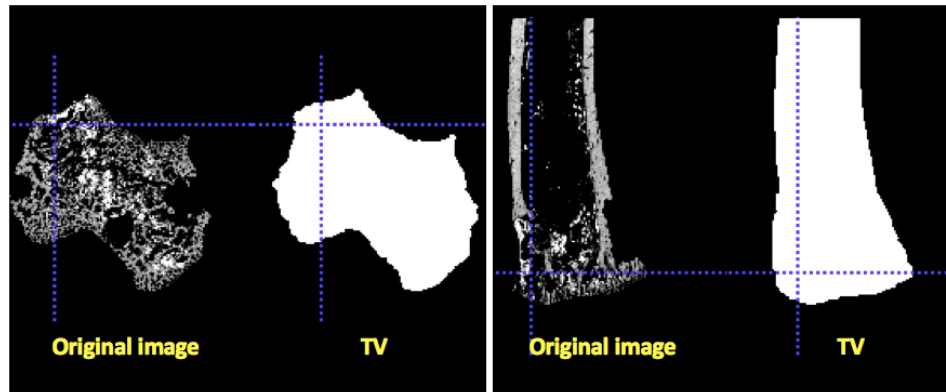

**Fig. S4** Slices of a 3D original image (left) and the generated total volume (right)

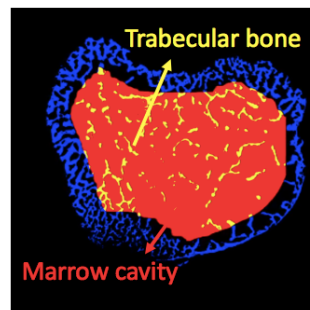

**Fig. S5** Illustration of the resulting marrow cavity (red), trabecular bone (yellow), and cortical bone (blue) in one slice
